# Supplementary material for: Do Older Women of Reproductive Age Have Better Diet Quality than Younger Women of Reproductive Age?
Source: MDPI journal article supplement (doi:10.3390/nu13113830), 2021-10-27
Supplement: s1 [file s1]

**Supplementary Table S1. Likelihood for adherence to AGHE and AMDR recommendations among women without compared to with child.**

|                           | Reference                 | 19-35 y                |                                   | 35-50 y                |                                   |
|---------------------------|---------------------------|------------------------|-----------------------------------|------------------------|-----------------------------------|
|                           |                           | Unadjusted OR (95% CI) | Adjusted <sup>1</sup> OR (95% CI) | Unadjusted OR (95% CI) | Adjusted <sup>1</sup> OR (95% CI) |
| Vegetables & alternatives | < 5 servings/day          | 1.06 (0.49, 2.28)      | 0.89 (0.32, 2.41)                 | 1.21 (0.25, 5.73)      | 1.04 (0.10, 10.44)                |
| Fruits                    | < 2 servings/day          | 1.17 (0.56, 2.46)      | 1.01 (0.43, 2.38)                 | 1.06 (0.54, 2.07)      | 0.89 (0.33, 2.41)                 |
| Grains                    | < 6 servings/day          | 1.18 (0.47, 2.92)      | 1.15 (0.33, 3.93)                 | 1.15 (0.17, 7.78)      | 1.18 (0.13, 10.37)                |
| Meat & alternatives       | < 2.5 servings/day        | 0.80 (0.38, 1.64)      | 0.69 (0.32, 1.49)                 | 1.01 (0.27, 3.73)      | 0.80 (0.30, 2.13)                 |
| Dairy                     | < 2.5 servings/day        | 1.17 (0.26, 5.13)      | 1.19 (0.18, 7.92)                 | 0.81 (0.44, 1.51)      | 0.83 (0.35, 1.97)                 |
| Alcohol                   | < 40 g/day                | 0.39 (0.10, 1.42)      | 0.41 (0.10, 1.54)                 | 0.72 (0.17, 3.04)      | 0.55 (0.13, 2.30)                 |
| Sugar                     | < 10% daily energy intake | 0.92 (0.58, 1.48)      | 0.83 (0.44, 1.56)                 | 0.90 (0.47, 1.73)      | 0.90 (0.43, 1.90)                 |
| Sodium                    | < 2000 mg/day             | 1.08 (0.54, 2.19)      | 0.96 (0.45, 2.03)                 | 0.97 (0.39, 2.38)      | 0.97 (0.45, 2.07)                 |
| SFA                       | < 10% daily energy intake | 1.14 (0.54, 2.37)      | 0.92 (0.44, 1.88)                 | 1.09 (0.38, 3.13)      | 0.95 (0.41, 2.21)                 |
| Carbohydrate              | < 45%                     | 0.87 (0.45, 1.67)      | 0.91 (0.50, 1.66)                 | 1.06 (0.30, 3.66)      | 1.16 (0.41, 3.27)                 |
| Protein                   | < 15%                     | 0.90 (0.49, 1.66)      | 1.06 (0.59, 1.88)                 | 0.90 (0.24, 3.29)      | 0.98 (0.24, 4.04)                 |
| Fat                       | < 20%                     | 0.66 (0.31, 1.40)      | 0.74 (0.35, 1.54)                 | 1.03 (0.58, 1.82)      | 1.16 (0.39, 3.39)                 |

<sup>1</sup>Adjusted for country of birth, household type, level of education, SEIFA, smoking status, alcohol (except for outcome: Alcohol), BMI, physical activity and number of supplements

**Supplementary Table S2. Dietary Guideline Index (DGI) among women without compared to with child.**

| DGI                              | 19-35 y          |                    |                      |         | 35-50 y          |                    |                      |         |
|----------------------------------|------------------|--------------------|----------------------|---------|------------------|--------------------|----------------------|---------|
|                                  | Mean (SE)        |                    | Mean difference (SE) | P-value | Mean (SE)        |                    | Mean difference (SE) | P-value |
|                                  | No child (n=545) | Have child (n=596) |                      |         | No child (n=368) | Have child (n=814) |                      |         |
| DGI (total score)                | 76.0 (3.1)       | 74.6 (2.7)         | 1.44 (2.79)          | 0.607   | 73.1 (3.8)       | 77.0 (3.1)         | -3.89 (2.51)         | 0.13    |
| DGI sub-components               |                  |                    |                      |         |                  |                    |                      |         |
| 1. Food variety                  | 2.0 (0.2)        | 2.0 (0.2)          | -0.01 (0.20)         | 0.942   | 2.2 (0.5)        | 2.4 (0.3)          | -0.20 (0.33)         | 0.63    |
| 2. Vegetables                    | 4.6 (0.6)        | 4.9 (0.7)          | -0.30 (0.52)         | 0.562   | 4.8 (1.2)        | 4.8 (0.7)          | -0.05 (0.77)         | 0.95    |
| 3. Fruit                         | 5.0 (0.8)        | 4.9 (0.8)          | 0.10 (0.69)          | 0.879   | 4.4 (1.4)        | 5.1 (0.8)          | -0.66 (1.50)         | 0.66    |
| 4. Cereal (total)                | 3.8 (0.6)        | 3.7 (0.6)          | 0.07 (0.47)          | 0.883   | 3.5 (1.0)        | 3.7 (0.7)          | -0.11 (0.55)         | 0.84    |
| 4a. Serves per day               | 2.4 (0.3)        | 2.5 (0.3)          | -0.08 (0.30)         | 0.801   | 2.3 (0.9)        | 2.3 (0.4)          | -0.040 (0.60)        | 0.95    |
| 4b. Mostly wholegrain            | 1.4 (0.4)        | 1.2 (0.4)          | 0.15 (0.34)          | 0.669   | 1.3 (0.5)        | 1.3 (0.4)          | -0.07 (0.40)         | 0.85    |
| 5. Meat and Alternatives (total) | 6.7 (0.8)        | 6.7 (0.6)          | 0.00 (0.80)          | 0.991   | 6.9 (0.8)        | 7.0 (0.6)          | -0.11 (0.50)         | 0.82    |
| 5a. Serves per day               | 2.4 (0.4)        | 2.5 (0.4)          | -0.12 (0.39)         | 0.761   | 2.6 (0.5)        | 2.7 (0.4)          | -0.16 (0.41)         | 0.70    |
| 5b. Mostly lean                  | 4.3 (0.5)        | 4.2 (0.3)          | 0.13 (0.44)          | 0.775   | 4.3 (0.4)        | 4.3 (0.3)          | 0.05 (0.16)          | 0.76    |
| 6. Dairy and alternatives        | 5.2 (0.8)        | 4.7 (0.6)          | 0.49 (0.85)          | 0.564   | 4.8 (0.9)        | 5.2 (0.6)          | -0.36 (1.07)         | 0.74    |
| 7. Fluid intake (total)          | 8.9 (0.3)        | 8.6 (0.3)          | 0.35 (0.26)          | 0.192   | 8.6 (0.4)        | 9.0 (0.4)          | -0.33 (0.36)         | 0.37    |
| 7a. Serves per day               | 4.3 (0.3)        | 4.0 (0.2)          | 0.26 (0.18)          | 0.160   | 4.2 (0.4)        | 4.4 (0.3)          | -0.13 (0.26)         | 0.62    |
| 7b. Mostly water                 | 4.7 (0.2)        | 4.6 (0.2)          | 0.09 (0.20)          | 0.654   | 4.4 (0.4)        | 4.6 (0.2)          | -0.20 (0.39)         | 0.61    |

|                                |           |           |              |       |           |           |              |      |
|--------------------------------|-----------|-----------|--------------|-------|-----------|-----------|--------------|------|
| 8. Limit discretionary foods   | 3.1 (1.1) | 3.0 (0.9) | 0.061 (0.75) | 0.935 | 3.5 (0.9) | 3.7 (1.3) | -0.16 (1.23) | 0.90 |
| 9. Limit saturated fat (total) | 7.9 (0.6) | 7.3 (0.6) | 0.63 (0.41)  | 0.130 | 7.9 (0.9) | 8.3 (0.5) | -0.40 (0.94) | 0.67 |
| 9a. Mostly trimmed meat        | 4.4 (0.4) | 4.1 (0.4) | 0.27 (0.25)  | 0.270 | 4.2 (0.4) | 4.4 (0.4) | -0.18 (0.38) | 0.64 |
| 9b. Mostly low-fat milk        | 3.5 (0.4) | 3.2 (0.4) | 0.36 (0.39)  | 0.358 | 3.7 (0.7) | 4.0 (0.4) | -0.22 (0.67) | 0.75 |
| 10. Moderate unsaturated-fat   | 8.5 (0.9) | 8.1 (0.8) | 0.34 (0.77)  | 0.662 | 7.9 (1.3) | 7.8 (1.1) | 0.14 (0.83)  | 0.87 |
| 11. Limit added salt (total)   | 5.1 (0.6) | 5.1 (0.4) | -0.01 (0.47) | 0.975 | 5.9 (0.7) | 5.3 (0.6) | 0.62 (0.45)  | 0.17 |
| 11a. During cooking            | 1.4 (0.3) | 1.5 (0.3) | -0.12 (0.28) | 0.666 | 2.2 (0.3) | 1.9 (0.4) | 0.37 (0.35)  | 0.29 |
| 11b. Added at the table        | 3.7 (0.5) | 3.6 (0.3) | 0.11 (0.35)  | 0.759 | 3.7 (0.5) | 3.4 (0.4) | 0.26 (0.27)  | 0.36 |
| 12. Limit extra sugar          | 6.0 (1.2) | 6.4 (1.2) | -0.41 (0.72) | 0.568 | 7.2 (1.3) | 6.6 (1.4) | 0.58 (2.18)  | 0.79 |
| 13. Limit alcohol              | 9.1 (0.4) | 9.6 (0.4) | -0.55 (0.30) | 0.073 | 8.5 (0.9) | 9.1 (0.5) | -0.54 (0.73) | 0.46 |

All analyses adjusted for country of birth, household type, level of education, SEIFA, smoking status, alcohol (except for the outcome: Limit alcohol), BMI, physical activity and number of supplements
